# Supplementary material
Source: PubMed Central journal article supplement (PMC5693358)

Figure S4

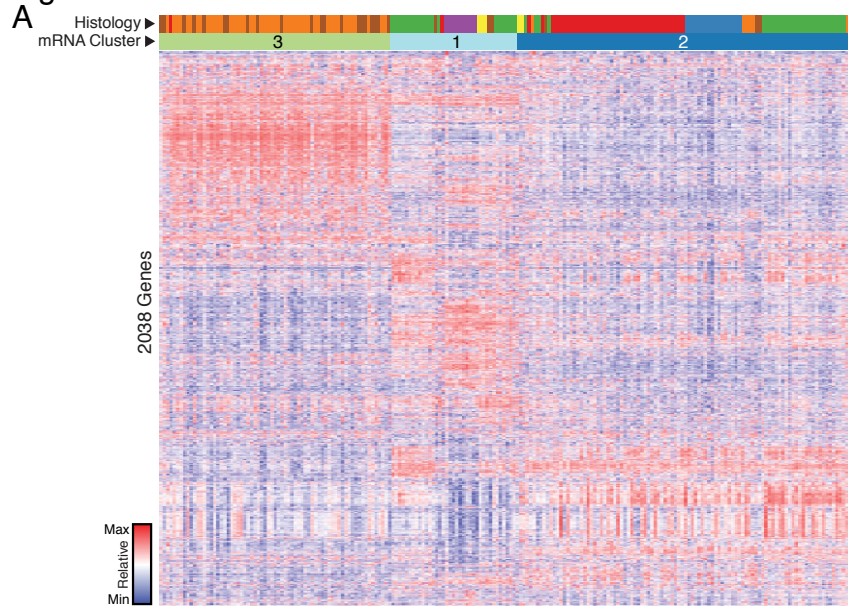

Histology

- Myxofibrosarcoma
- Undifferentiated Pleomorphic Sarcoma
- Malignant Peripheral Nerve Sheath Tumor
- Dedifferentiated Liposarcoma
- Gynecologic Leiomyosarcoma
- Soft Tissue Leiomyosarcoma
- Synovial Sarcoma

**C**

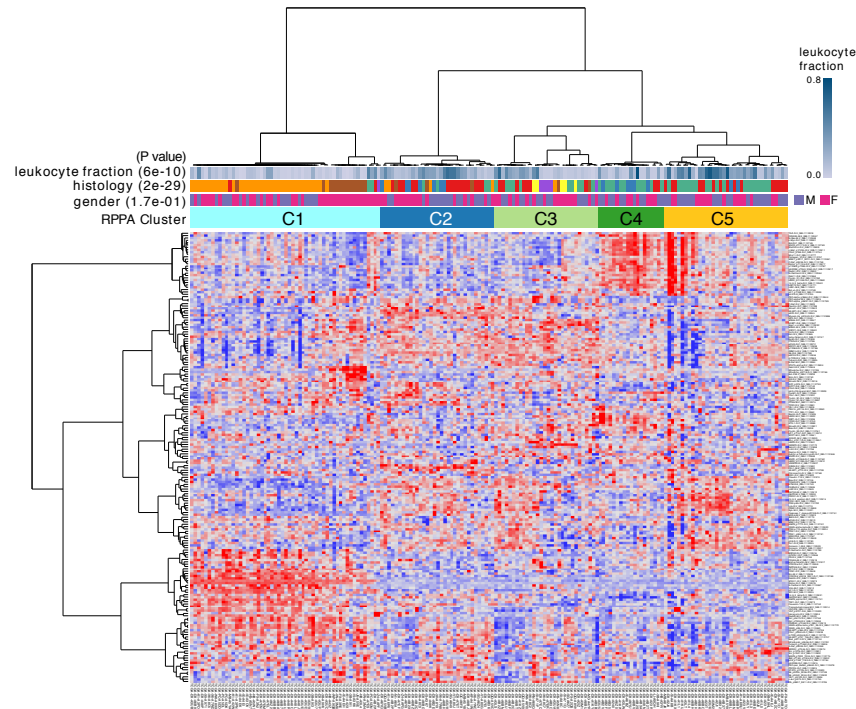

**B**

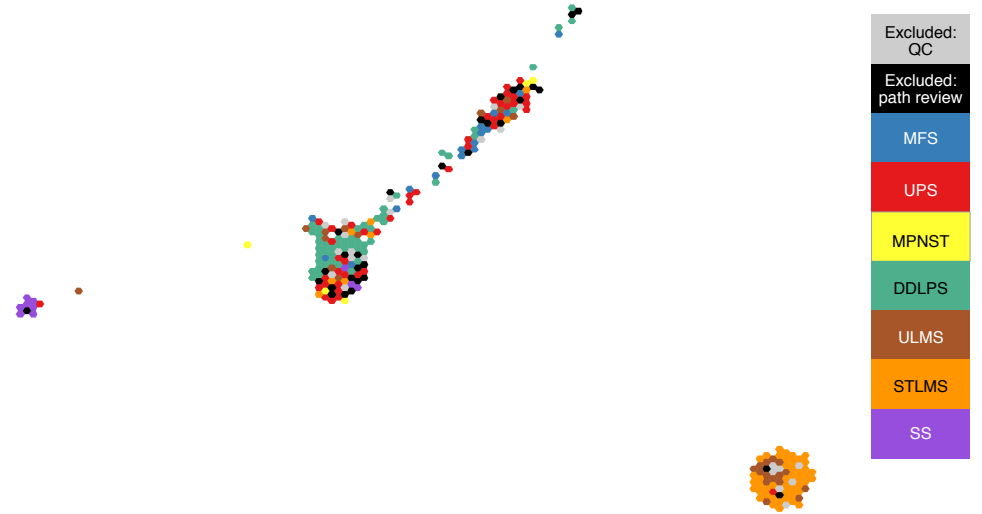

**D**

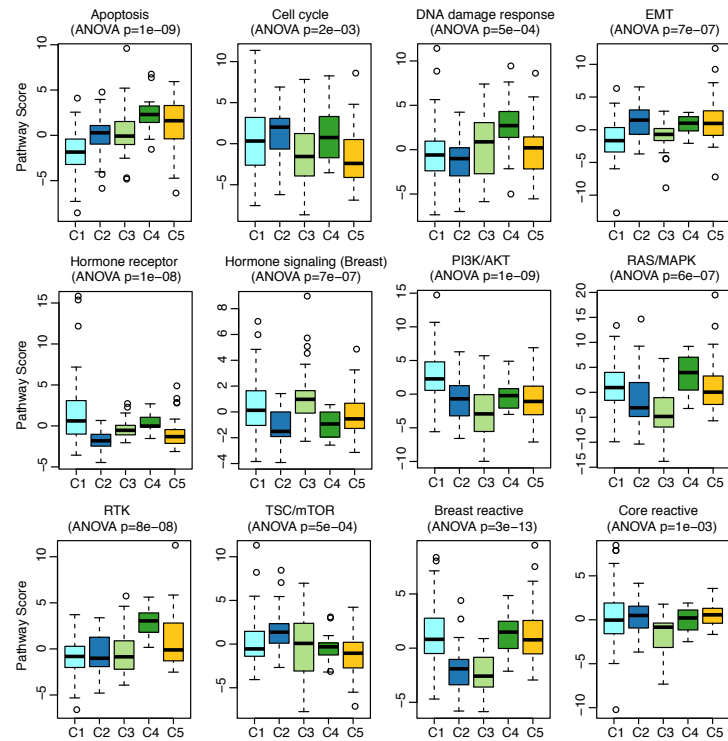

Supplement: NIHMS912614-supplement-1.pdf [file NIHMS912614-supplement-1.pdf]
