# Supplementary material
Source: PubMed Central journal article supplement (PMC5693358)

Figure S1

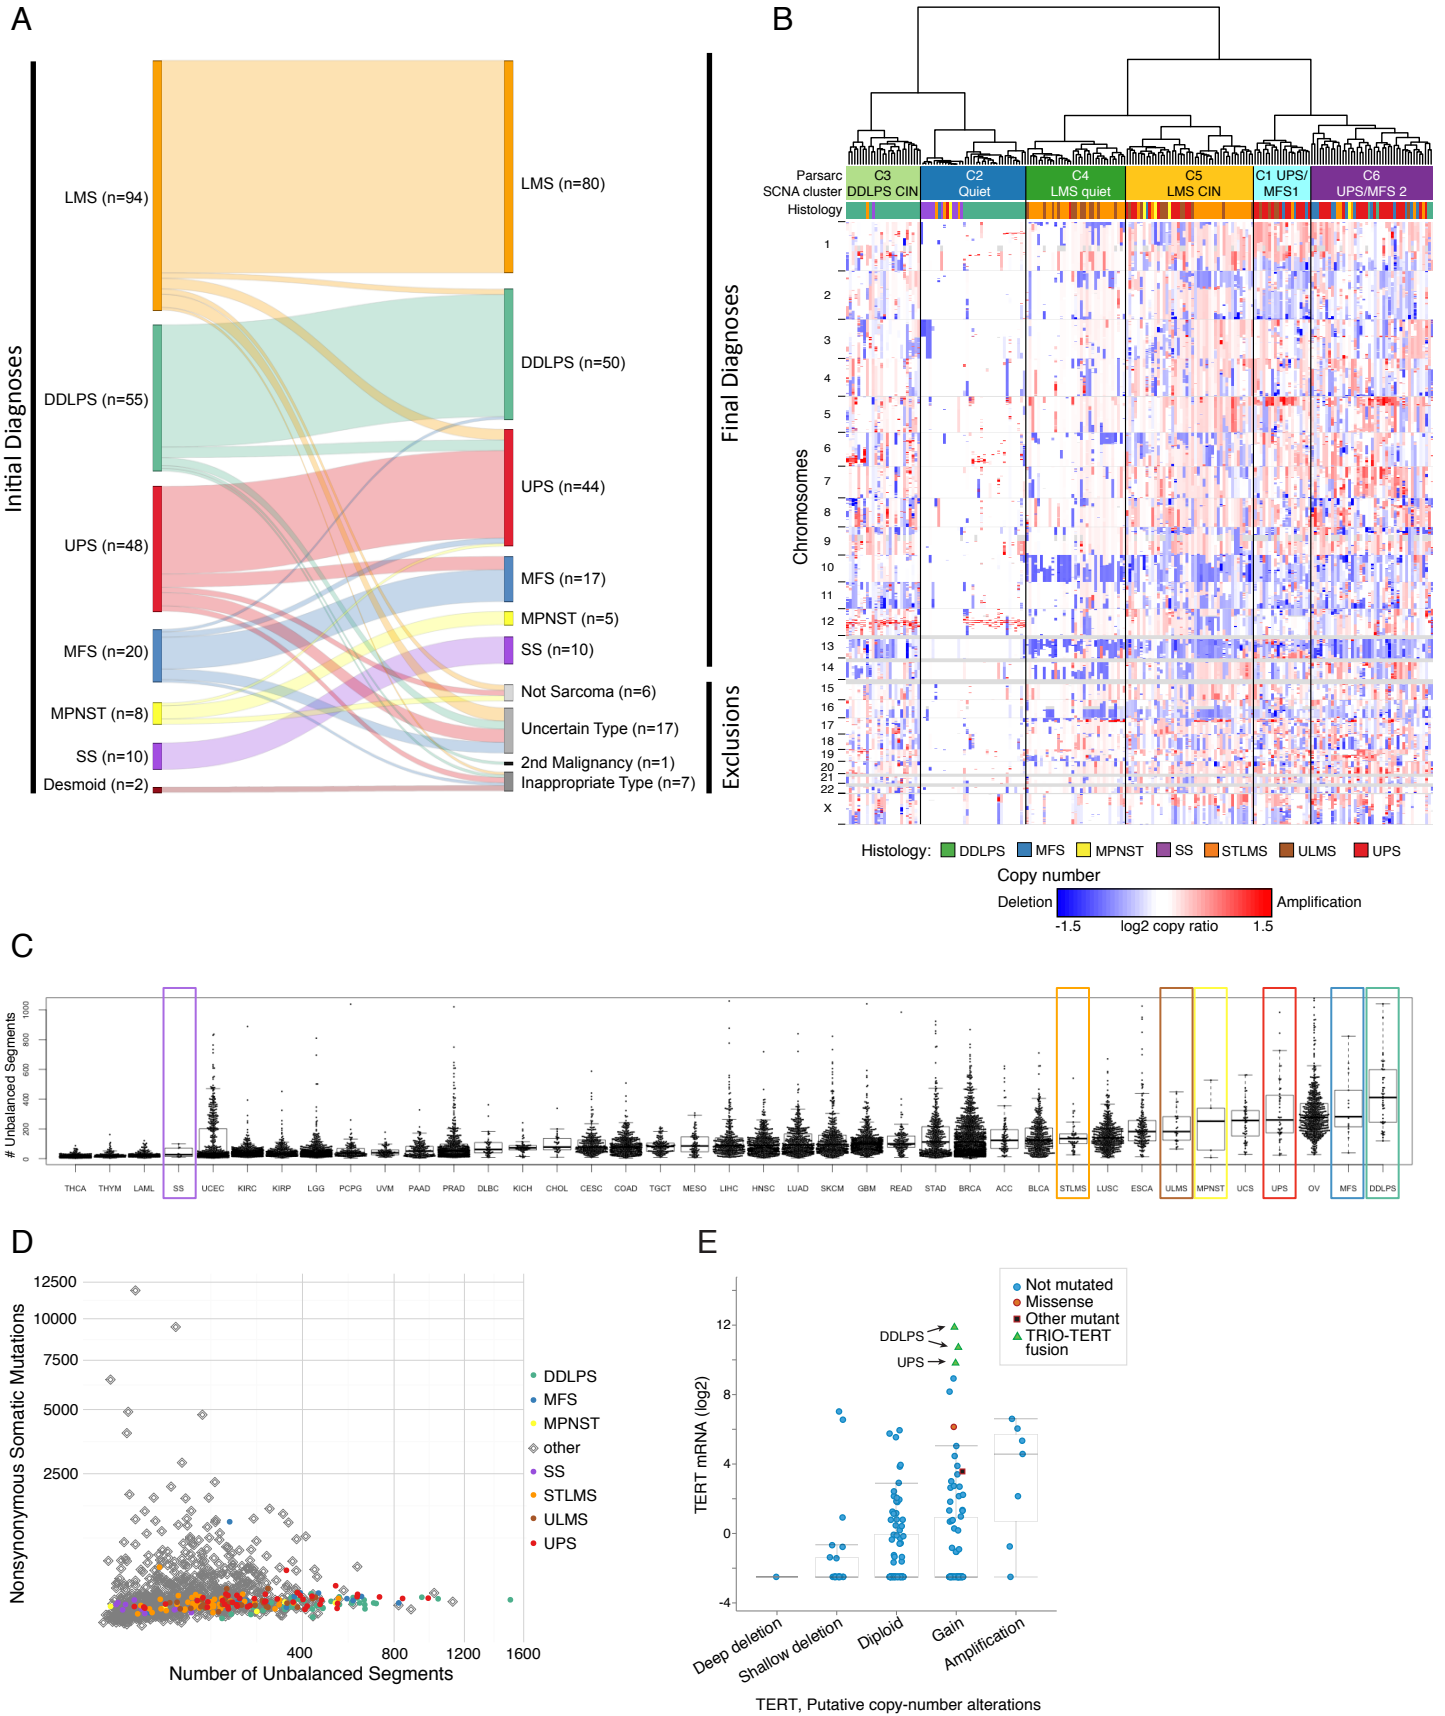

Supplement: NIHMS912614-supplement-2.pdf [file NIHMS912614-supplement-2.pdf]
