# Supplementary material
Source: PubMed Central journal article supplement (PMC5693358)

Figure S2

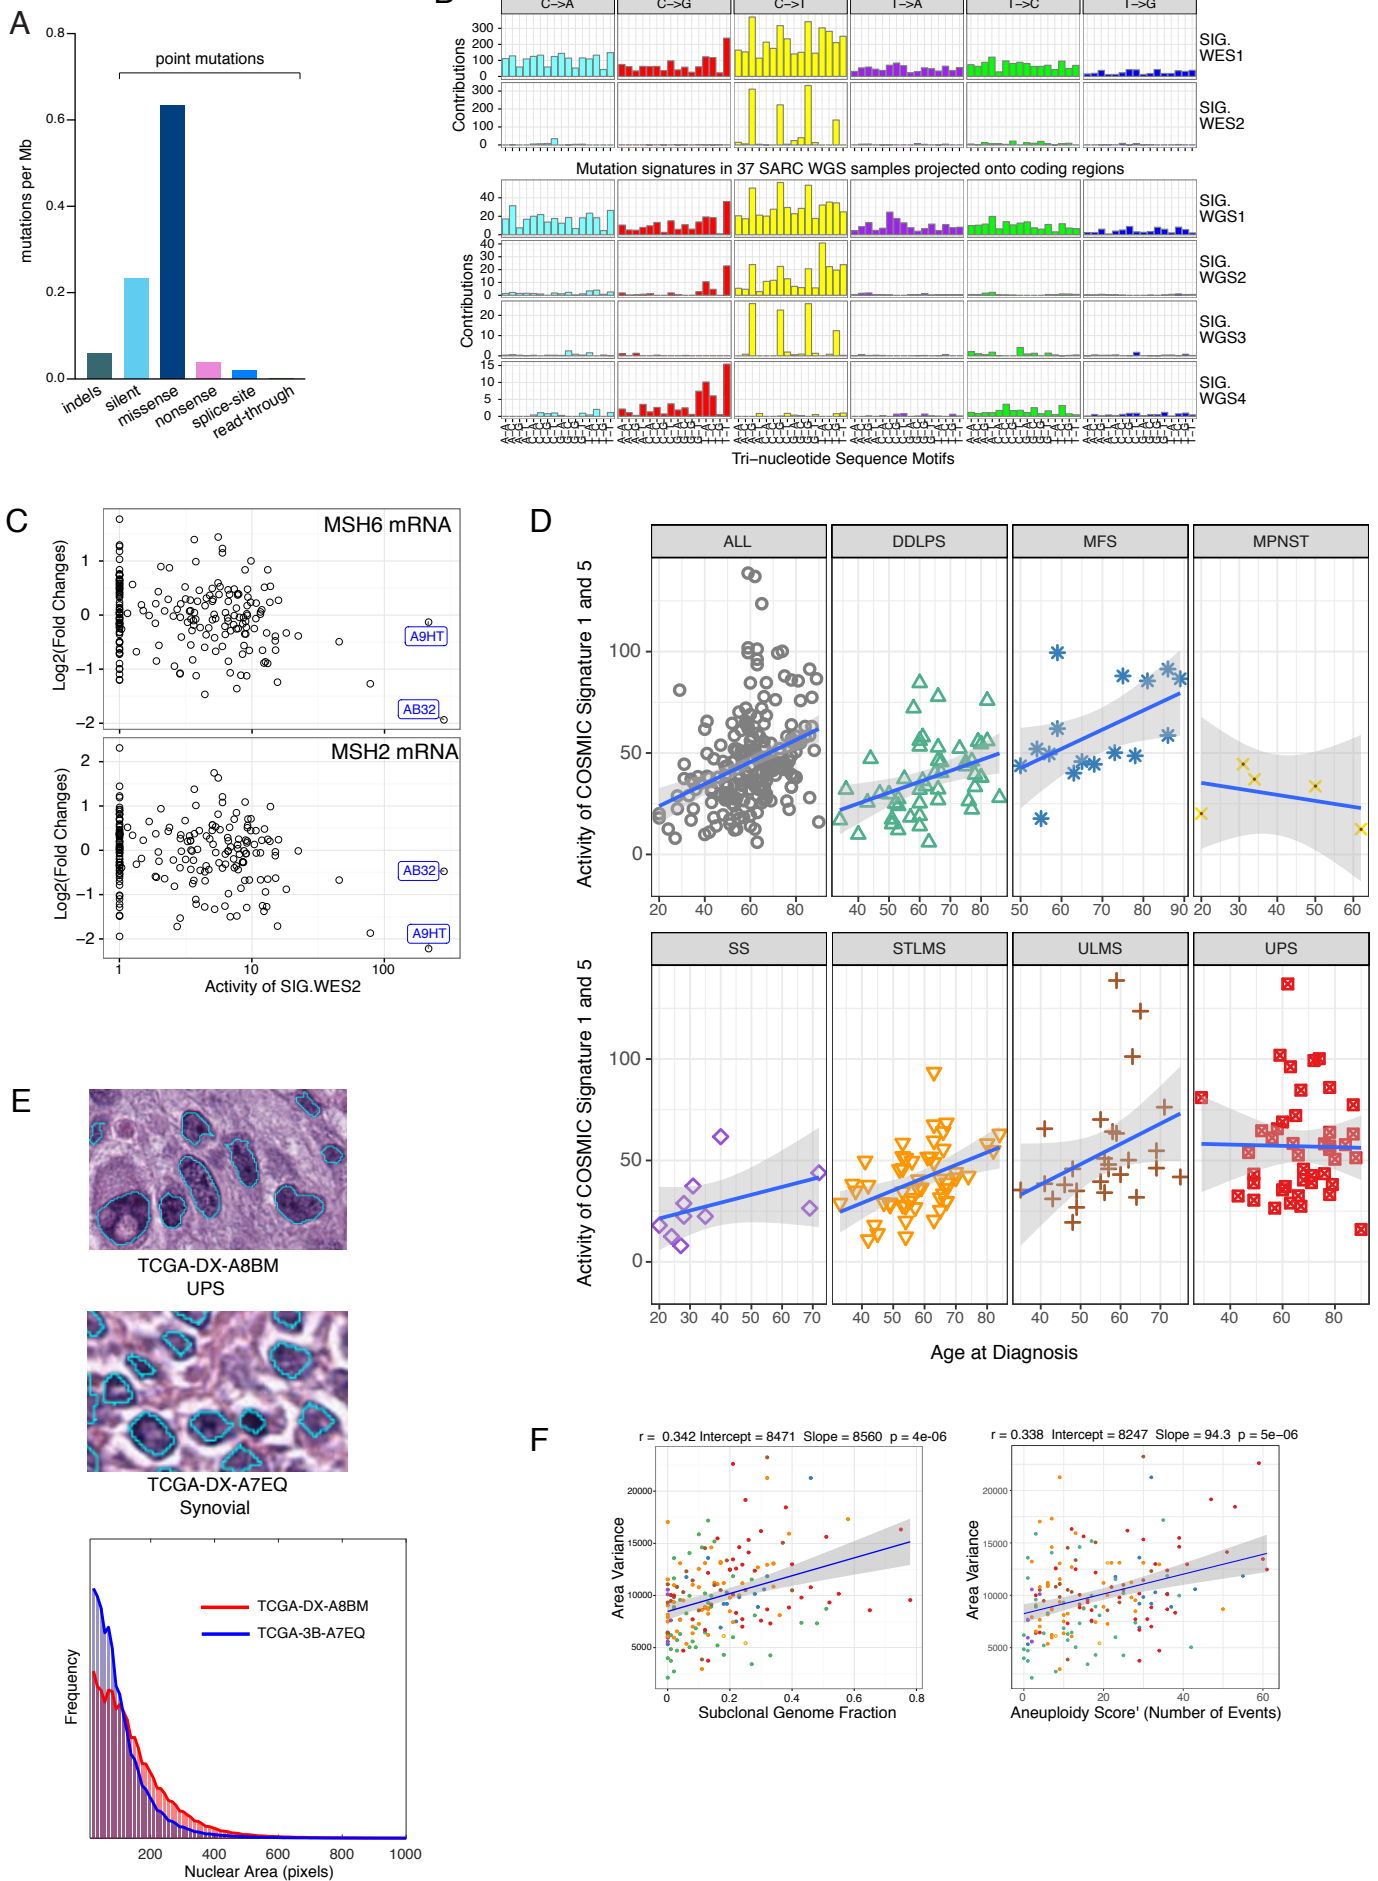

Supplement: NIHMS912614-supplement-3.pdf [file NIHMS912614-supplement-3.pdf]
