# Supplementary material
Source: PubMed Central journal article supplement (PMC5693358)

Figure S3

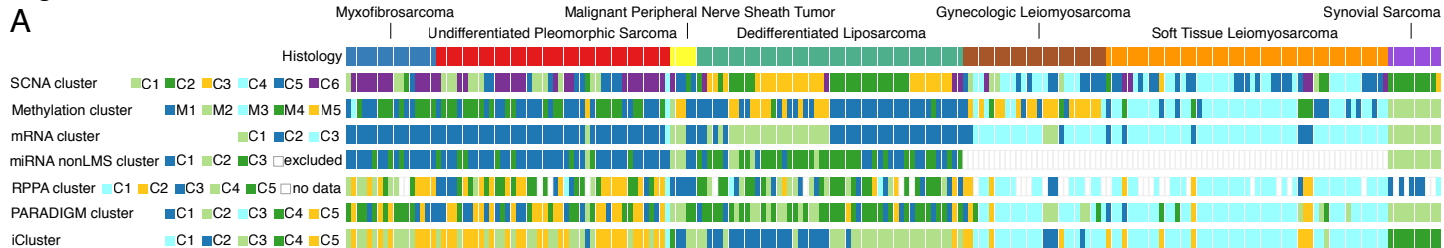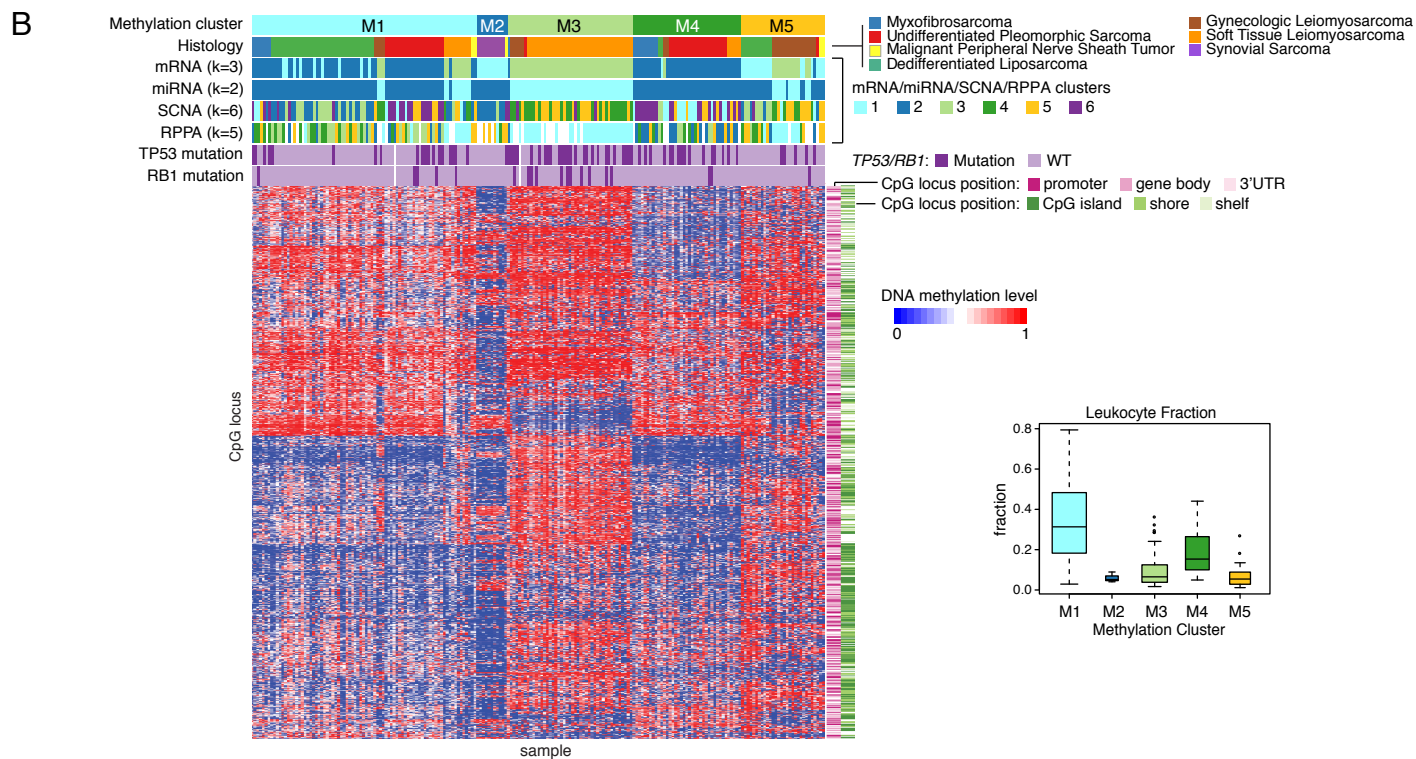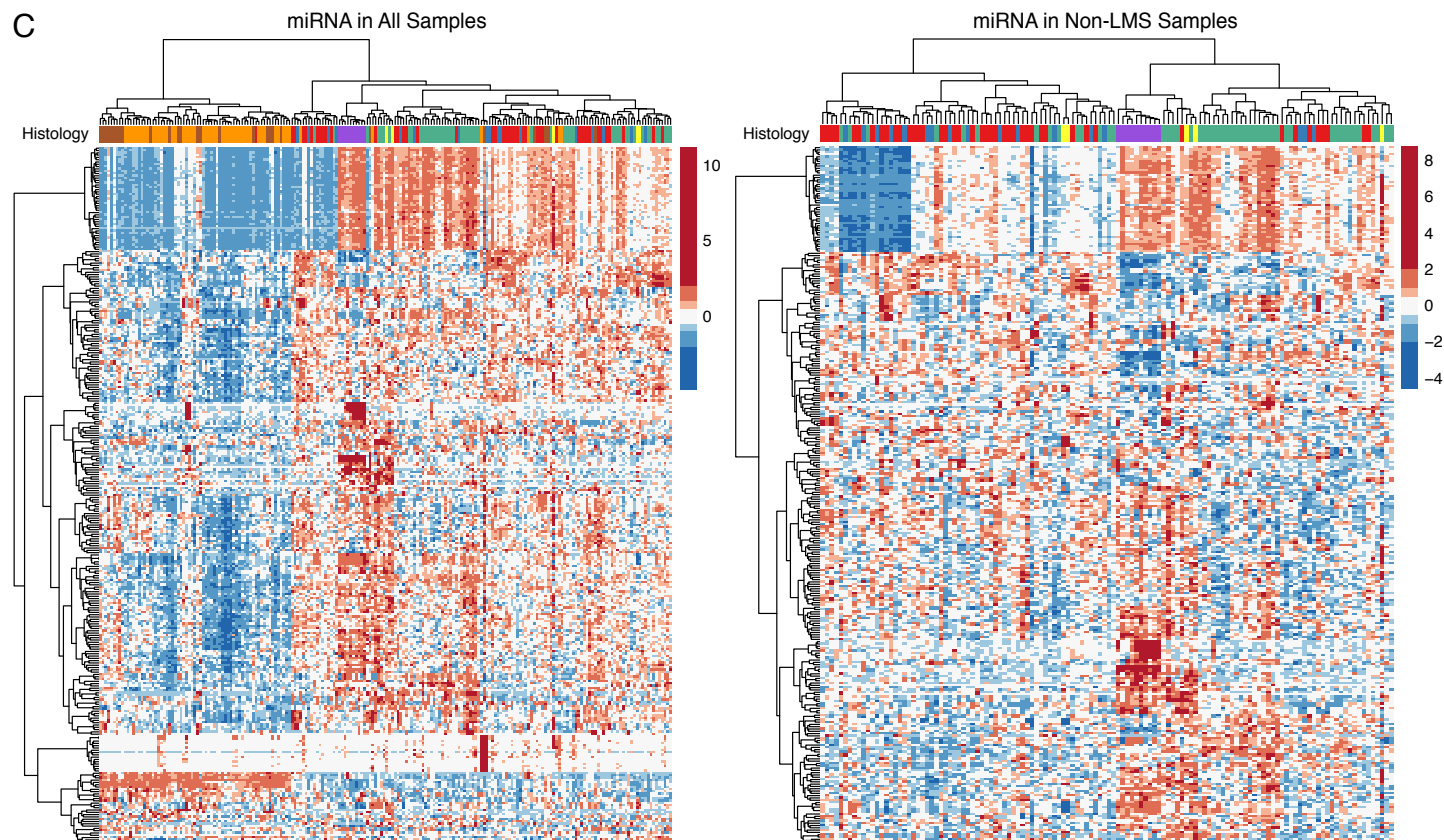

Supplement: NIHMS912614-supplement-4.pdf [file NIHMS912614-supplement-4.pdf]
