# Supplementary material
Source: PubMed Central journal article supplement (PMC5693358)

Figure S5

A

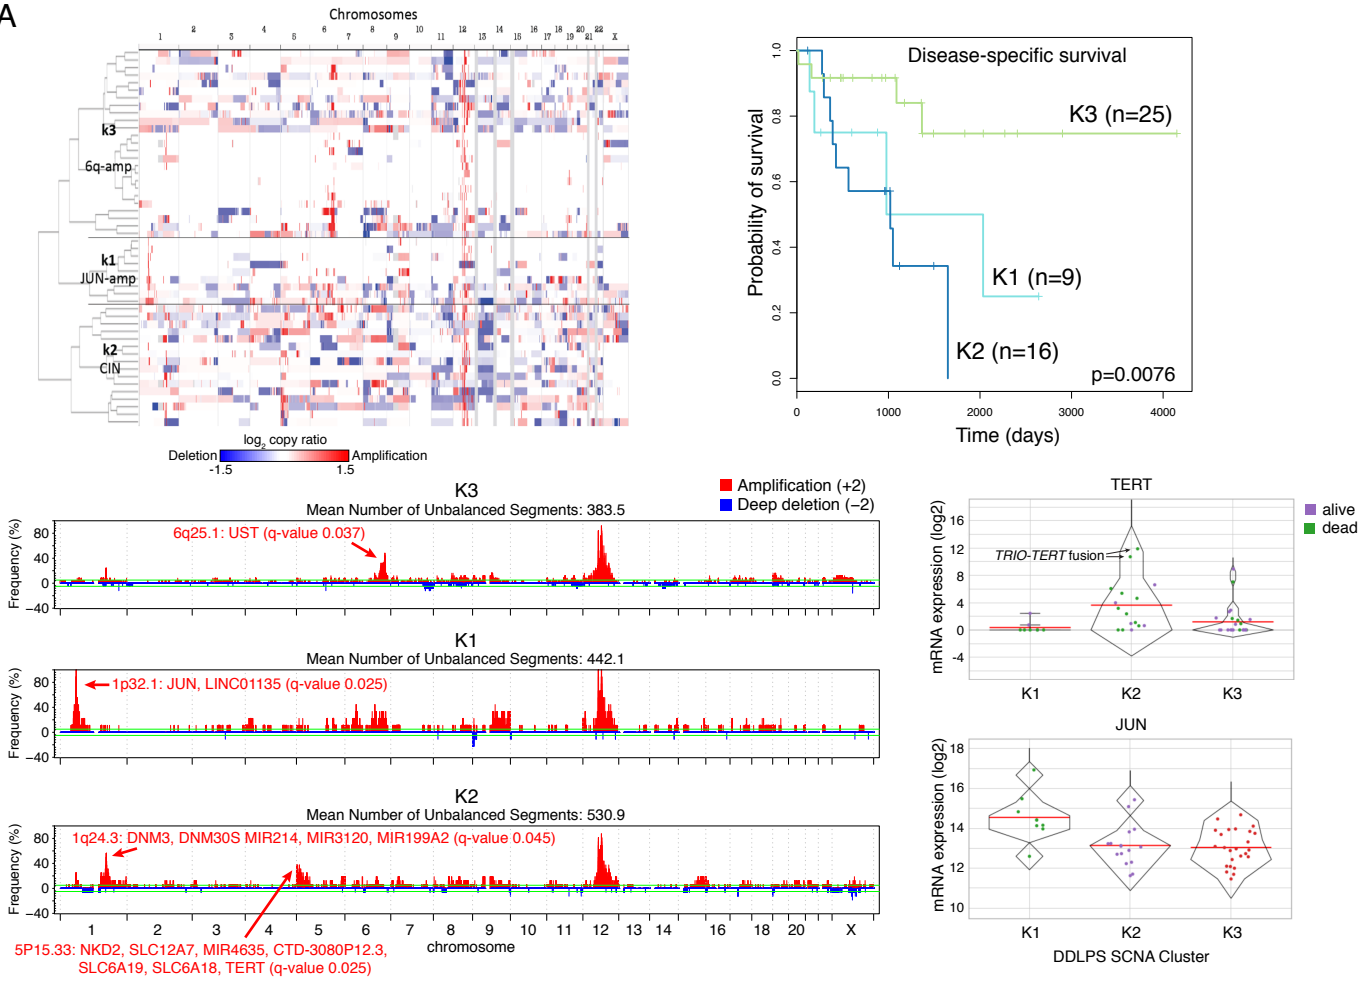

B

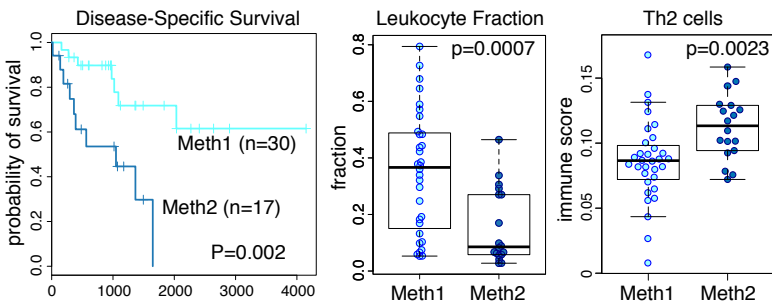

C

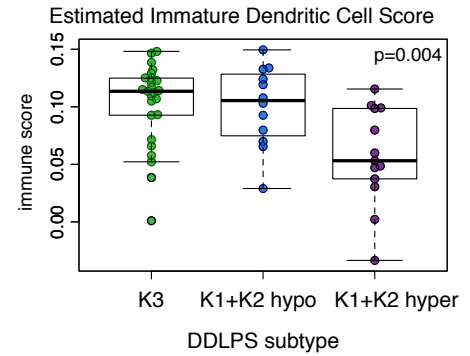

Supplement: NIHMS912614-supplement-5.pdf [file NIHMS912614-supplement-5.pdf]
