# Supplementary material
Source: PubMed Central journal article supplement (PMC5693358)

Figure S7

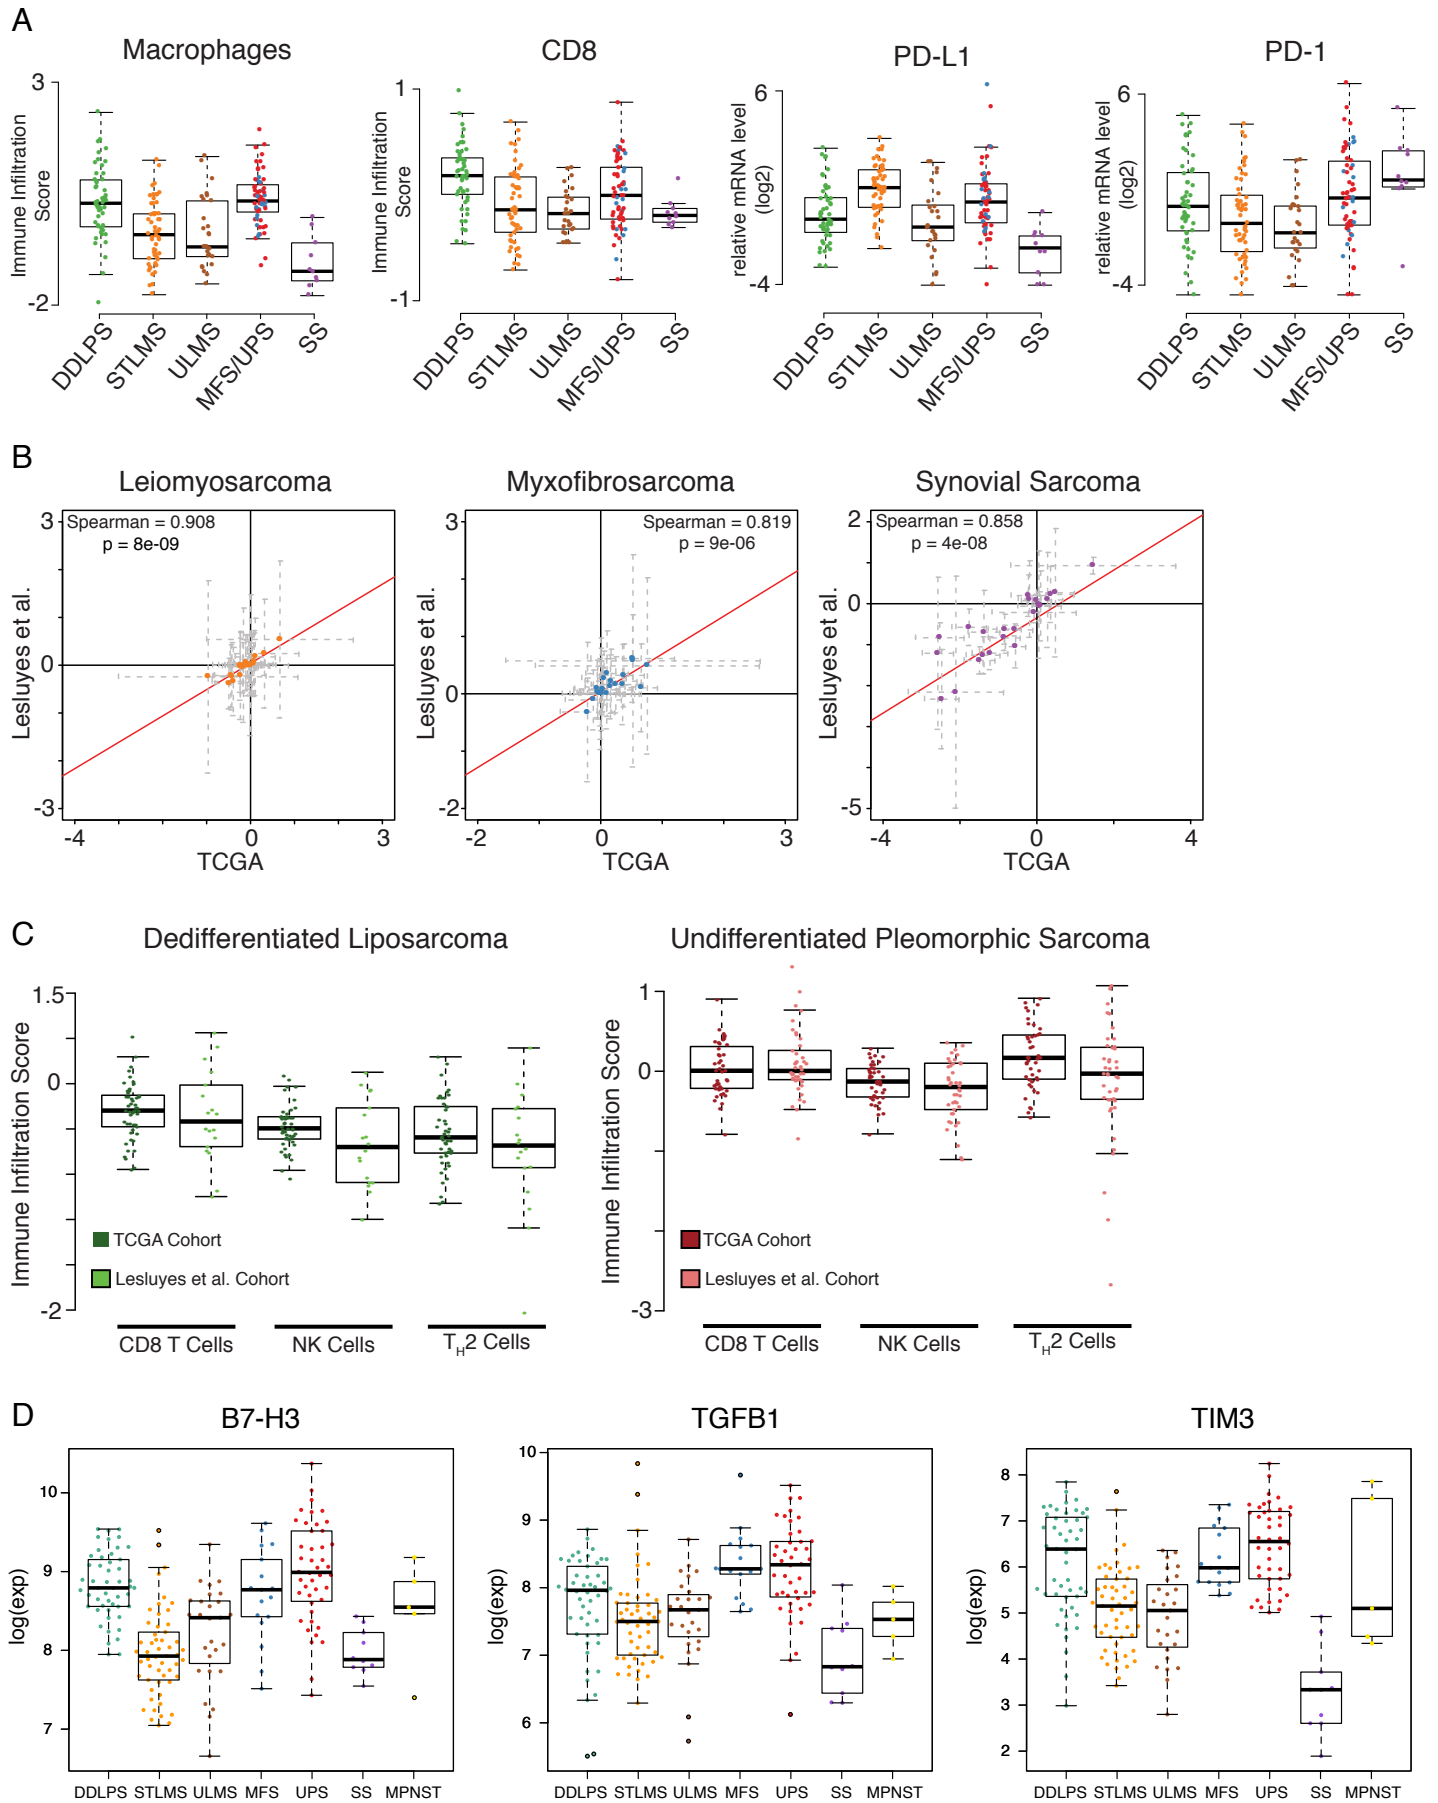

Supplement: NIHMS912614-supplement-7.pdf [file NIHMS912614-supplement-7.pdf]
