# Supplementary material
Source: PubMed Central journal article supplement (PMC5693358)
Supplement: NIHMS912614-supplement-8.pdf [file NIHMS912614-supplement-8.pdf]

## Methods S1. Author Contributions and Affiliations

### Genome Sequencing Centers

Gad Getz<sup>1,2,3</sup>, Michael D. McLellan<sup>4</sup>, Matthew H. Bailey<sup>4</sup>, Christopher A. Miller<sup>4</sup>, Elizabeth L. Appelbaum<sup>4</sup>, Matthew G. Cordes<sup>4</sup>, Catrina C. Fronick<sup>4</sup>, Lucinda A. Fulton<sup>4</sup>, Robert S. Fulton<sup>4</sup>, Elaine R. Mardis<sup>4</sup>, Heather K. Schmidt<sup>4</sup>, Winghing Wong<sup>4</sup>, Richard K. Wilson<sup>4</sup>, Venkata Yellapantula<sup>4</sup>, Amie J. Radenbaugh<sup>5</sup>

### Genome Characterization Centers

Gad Getz<sup>1,2,3</sup>, Lynda Chin<sup>1,6,7</sup>, Gordon Saksena<sup>1</sup>

### RNA sequencing and analysis

Katherine A. Hoadley<sup>8,9</sup>, D. Neil Hayes<sup>9,10</sup>, Joel S. Parker<sup>8,9</sup>, Matthew D. Wilkerson<sup>8</sup>, J. Todd Auman<sup>11</sup>, Saianand Balu<sup>9</sup>, Tom Bodenheimer<sup>9</sup>, Alan P. Hoyle<sup>9</sup>, Stuart R. Jefferys<sup>9</sup>, Corbin D. Jones<sup>12,13</sup>, Shaowu Meng<sup>9</sup>, Piotr A. Mieczkowski<sup>8</sup>, Lisle E. Mose<sup>9</sup>, Charles M. Perou<sup>8,9,11</sup>, Jeffrey Roach<sup>14</sup>, Yan Shi<sup>9</sup>, Janae V. Simons<sup>9</sup>, Tara Skelly<sup>8</sup>, Matthew G. Soloway<sup>9</sup>, Donghui Tan<sup>8</sup>, Umadevi Veluvolu<sup>8</sup>, Ian J. Davis<sup>8,15</sup>, Austin J. Hepperla<sup>9</sup>, Andrew S. Brohl<sup>16</sup>, Katayoon Kasaian<sup>17</sup>, Karen Mungall<sup>17</sup>, Sara Sadeghi<sup>17</sup>, Floris P. Barthel<sup>18</sup>, Roel Verhaak<sup>18</sup>, Xin Hu<sup>7</sup>  
*Immune signatures*: Ian J. Davis<sup>8,15</sup>, Austin J. Hepperla<sup>9</sup>, Katherine A. Hoadley<sup>8,9</sup>, Frederic Chibon<sup>108</sup>

### Copy number analysis

Andrew D. Cherniack<sup>1,19</sup>, Juliann Shih<sup>1,19</sup>, Rameen Beroukhi<sup>1,19,20</sup>, Matthew Meyerson<sup>1,19,21</sup>, Carrie Cibulskis<sup>1</sup>, Stacey B. Gabriel<sup>1</sup>, Gordon Saksena<sup>1</sup>, Steven E. Schumacher<sup>1,22</sup>

### Mutation and significantly mutated gene analysis

Matthew H. Bailey<sup>4</sup>, Qingsong Gao<sup>4</sup>, Winghing Wong<sup>4</sup>, Matthew Wyczalkowski<sup>4</sup>

### MiRNA sequencing

Reanne Bowlby<sup>17</sup>, A. Gordon Robertson<sup>17</sup>, Adrian Ally<sup>17</sup>, Miruna Balasundaram<sup>17</sup>, Denise Brooks<sup>17</sup>, Rebecca Carlsen<sup>17</sup>, Eric Chuah<sup>17</sup>, Noreen Dhalla<sup>17</sup>, Robert A. Holt<sup>17</sup>, Steven J.M. Jones<sup>17</sup>, Darlene Lee<sup>17</sup>, Irene Li<sup>17</sup>, Yussanne Ma<sup>17</sup>, Marco A. Marra<sup>17</sup>, Michael Mayo<sup>17</sup>, Richard A. Moore<sup>17</sup>, Andrew J. Mungall<sup>17</sup>, Jacqueline E. Schein<sup>17</sup>, Payal Sipahimalani<sup>17</sup>, Angela Tam<sup>17</sup>, Nina Thiessen<sup>17</sup>, Tina Wong<sup>17</sup>  
*miRNA Analysis*: Reanne Bowlby<sup>17</sup>, A. Gordon Robertson<sup>17</sup>

**DNA methylation analysis:** Ludmila Danilova<sup>23</sup>, Leslie Cope<sup>23</sup>, Stephen B. Baylin<sup>23</sup>, Moiz S. Bootwalla<sup>24</sup>, Phillip H. Lai<sup>24</sup>, Peter W. Laird<sup>25</sup>, Dennis T. Maglinte<sup>24</sup>, David J. Van Den Berg<sup>24</sup>, Daniel J. Weisenberger<sup>24</sup>, John Wrangle<sup>26</sup>

### Genome Data Analysis Centers

*iCluster Analysis*: Esther Drill<sup>27</sup>, Ronglai Shen<sup>27</sup>

*Regulome explorer*: Lisa Iype<sup>28</sup>, Sheila M. Reynolds<sup>28</sup>, Ilya Shmulevich<sup>28</sup>

*Integrative pathway analyses:* Christina Yau<sup>29</sup>, Joshua Armenia<sup>30</sup>, Eric Minwei Liu<sup>31</sup>, Christopher Benz<sup>29</sup>, Alessandro Pastore<sup>31</sup>, Nikolaus Schultz<sup>30</sup>

*RPPA analysis:* Rehan Akbani<sup>32</sup>, Apurva M. Hegde<sup>32</sup>, Wenbin Liu<sup>32</sup>, Yiling Lu<sup>33</sup>, Gordon B. Mills<sup>33</sup>, John N. Weinstein<sup>32</sup>, Jason Roszik<sup>7,34</sup>

*CoCA analysis:* Pavana Anur<sup>35</sup>, Paul Spellman<sup>35</sup>, Lixia Diao<sup>32</sup>

*cBioPortal:* Adam Abeshouse<sup>30</sup>, Hsiao-Wei Chen<sup>30</sup>, Jianjiong Gao<sup>30</sup>, Zachary Heins<sup>30</sup>, Ritika Kundra<sup>30</sup>, Angelica Ochoa<sup>30</sup>, Nicholas Socci<sup>31</sup>, Hongxin Zhang<sup>30</sup>

*iCoMut:* Michael S. Noble<sup>1</sup>, David I. Heiman<sup>1</sup>

*Mutation signature analysis:* Jaegil Kim<sup>1</sup>

*EMT analysis:* Lauren Byers<sup>36</sup>, Lixia Diao<sup>32</sup>, Jing Wang<sup>32</sup>

*Sarcoma tumor map:* Yulia Newton<sup>38</sup>

*Other:* Lynda Chin<sup>1,6,7</sup>, Gad Getz<sup>1,2,3</sup>, Juok Cho<sup>1</sup>, Timothy Defreitas<sup>1</sup>, Scott Frazer<sup>1</sup>, Nils Gehlenborg<sup>1,37</sup>, D. Neil Hayes<sup>9,10</sup>, Erik Larsson<sup>31</sup>, Michael S. Lawrence<sup>1</sup>, Kjong-Van Lehmann<sup>31</sup>, Pei Lin<sup>1</sup>, Sam Meier<sup>1</sup>, Joel S. Parker<sup>8,9</sup>, Gordon Saksena<sup>1</sup>, Francisco Sanchez-Vega<sup>30</sup>, Chris Sander<sup>31</sup>, Yasin Senbabaoglu<sup>31</sup>, Doug Voet<sup>1</sup>, Matthew D. Wilkerson<sup>8</sup>, Hailei Zhang<sup>1</sup>,

## **Computational Histology**

Lee A.D. Cooper<sup>39</sup>, David A. Gutman<sup>39</sup>, Sanghoon Lee<sup>39</sup>, Michael Nalisnik<sup>39</sup>

## **Biospecimen Core Resource**

Jay Bowen<sup>40</sup>, Julie M. Gastier-Foster<sup>40,41</sup>, Mark Gerken<sup>40</sup>, Carmen Helsel<sup>40</sup>, Shital Hobensack<sup>40</sup>, Kristen M. Leraas<sup>40</sup>, Tara M. Lichtenberg<sup>40</sup>, Nilsa C. Ramirez<sup>40,41</sup>, Lisa Wise<sup>40</sup>, Erik Zmuda<sup>40</sup>

## **Tissue source sites**

Matthew L. Anderson<sup>42</sup>, Patricia Castro<sup>42</sup>, Michael Ittmann<sup>42</sup>, Elena Gordienko<sup>43</sup>, Oxana Paklina<sup>43,44</sup>, Galiya Setdikova<sup>43</sup>, Chandrajit P. Raut<sup>45,46,47</sup>, Beth Y. Karlan<sup>48</sup>, Jenny Lester<sup>48</sup>, Dmitry Belyaev<sup>49</sup>, Victoria Fulidou<sup>49</sup>, Olga Potapova<sup>49</sup>, Olga Voronina<sup>49</sup>, George D. Demetri<sup>50,51</sup>, Suresh S. Ramalingam<sup>52</sup>, Madhusmita Behera<sup>52</sup>, Keith Delman<sup>52</sup>, Taofeek K. Owonikoko<sup>52</sup>, Gabriel L. Sica<sup>52</sup>, Jeff Boyd<sup>53</sup>, Anthony Magliocco<sup>54</sup>, Andrew Salner<sup>55</sup>, Joesph Bennett<sup>56</sup>, Mary Iacocca<sup>56</sup>, Patricia Swanson<sup>56</sup>, Peter Dottino<sup>57</sup>, Tamara Kalir<sup>58</sup>, Elena Pereira<sup>57</sup>, Teniola Akeredolu<sup>59</sup>, Daniel Crain<sup>59</sup>, Erin Curley<sup>60</sup>, Johanna Gardner<sup>60</sup>, David Mallery<sup>60</sup>, Scott Morris<sup>60</sup>, Joseph Paulauskis<sup>60</sup>, Robert Penny<sup>60</sup>, Candace Shelton<sup>60</sup>, Troy Shelton<sup>60</sup>, Eric Thompson<sup>60</sup>, Dave B. Hoon<sup>61</sup>, Jeremy Parfitt<sup>62</sup>, Michael Birrer<sup>63</sup>, Apollon Karseladze<sup>64</sup>, Armaz Mariamidze<sup>65</sup>, Fanny Dao<sup>66</sup>, Douglas A. Levine<sup>66</sup>, Narciso Olvera<sup>66</sup>, Robert G. Maki<sup>67,68</sup>, John Bartlett<sup>69</sup>, Jennifer Eschbacher<sup>70</sup>, Michael Dubina<sup>71</sup>, Evgeny Mozgovoy<sup>71</sup>, Konstantin Fedosenko<sup>72</sup>, Georgy Manikhas<sup>72</sup>, Harman Sekhon<sup>73</sup>, Nilsa Ramirez<sup>40</sup>, Davis R. Ingram<sup>74</sup>, Keila E. Torres<sup>7,75</sup>, Phil DiSaia<sup>76</sup>, Andrew K. Godwin<sup>77</sup>, Eryn M. Godwin<sup>77</sup>,

Hanlue Kuo<sup>77</sup>, Rashna Madan<sup>77</sup>, Colleen Reilly<sup>77</sup>, Clement Adebamowo<sup>59,78,79,80</sup>, Sally N. Adebamowo<sup>59,78,80</sup>, Thèrèse Bocklage<sup>81</sup>, Kelly Higgins<sup>82</sup>, Cathleen Martinez<sup>83</sup>, J. Todd Auman<sup>11</sup>, Lori Boice<sup>83</sup>, Juneko E. Grilley-Olson<sup>9,10</sup>, Mei Huang<sup>83</sup>, Amy H. Perou<sup>8</sup>, Leigh B. Thorne<sup>9,11</sup>, W. Kimryn Rathmell<sup>84,85</sup>, David H. Gutmann<sup>86</sup>, Samuel Singer<sup>101</sup>

### **Data Coordination Center**

Sudha Chudamani<sup>87</sup>, Jia Liu<sup>88</sup>, Laxmi Lolla<sup>87</sup>, Rashi Naresh<sup>89</sup>, Todd Pihl<sup>89</sup>, Qiang Sun<sup>89</sup>, Yunhu Wan<sup>89</sup>, Ye Wu<sup>87</sup>

### **Project team**

Ina Felau<sup>90</sup>, Jean C. Zenklusen<sup>90</sup>, John A. Demchok<sup>90</sup>, Martin L. Ferguson<sup>91</sup>, Carolyn M. Hutter<sup>92</sup>, Heidi J. Sofia<sup>92</sup>, Roy Tarnuzzer<sup>90</sup>, Zhining Wang<sup>90</sup>, Liming Yang<sup>90</sup>, Jiashan (Julia) Zhang<sup>90</sup>

*Project coordinator:* Ina Felau<sup>90</sup>

### **Expert Pathology Panel**

Elizabeth G. Demicco<sup>58</sup>, Leona A. Doyle<sup>93</sup>, Jason L. Hornick<sup>93</sup>, Alexander J. Lazar<sup>74,94</sup>, Brian P. Rubin<sup>95</sup>, Matt van de Rijn<sup>96</sup>

### **Clinical data subgroup**

Laurence Baker<sup>97</sup>, George D. Demetri<sup>50,51</sup>, Juneko E. Grilley-Olson<sup>9,10</sup>, Lisa Iype<sup>28</sup>, Alexander J. Lazar<sup>74,94</sup>, Tara M. Lichtenberg<sup>40</sup>, Chandrajit P. Raut<sup>45</sup>, Richard F. Riedel<sup>98</sup>, Samuel Singer<sup>101</sup>

### **Manuscript writing committee**

Elizabeth G. Demicco<sup>58</sup>, Li Ding<sup>4,99</sup>, Marc Ladanyi<sup>100</sup>, Alexander J. Lazar<sup>74,94</sup>, Janet E. Novak<sup>101</sup>, Francisco Sanchez-Vega<sup>30</sup>, Samuel Singer<sup>101</sup>, Brian A. Van Tine<sup>102</sup>

*Data coordinator:* Francisco Sanchez-Vega<sup>30</sup>

*Analysis Coordinator:* Ina Felau<sup>90</sup>, Francisco Sanchez-Vega<sup>30</sup>

*Manuscript coordinator:* Elizabeth G. Demicco<sup>58</sup>, Janet E. Novak<sup>101</sup>

### **Manuscript review and section contributions, study design**

Laurence Baker<sup>97</sup>, Lauren Byers<sup>36</sup>, Leslie Cope<sup>23</sup>, Andrew D. Cherniack<sup>1</sup>, Lee A. D. Cooper<sup>39</sup>, Ian J. Davis<sup>8,15</sup>, Lara E. Davis<sup>104</sup>, George D. Demetri<sup>50,51</sup>, Leona A. Doyle<sup>93</sup>, Esther Drill<sup>27</sup>, Andrew K. Godwin<sup>77</sup>, Juneko E. Grilley-Olson<sup>9,10</sup>, David H. Gutmann<sup>86</sup>, D. Neil Hayes<sup>9,10</sup>, Austin J. Hepperla<sup>9</sup>, Katherine A. Hoadley<sup>8,9</sup>, Dave B. Hoon<sup>61</sup>, Jason L. Hornick<sup>93</sup>, Lisa Iype<sup>28</sup>, Jaegil Kim<sup>1</sup>, Robert G. Maki<sup>67,68</sup>, Raphael E. Pollock<sup>103</sup>, Chandrajit P. Raut<sup>45,46,47</sup>, Richard F. Riedel<sup>98</sup>, A. Gordon Robertson<sup>17</sup>, Brian P. Rubin<sup>95</sup>, Juliann Shih<sup>1,19</sup>, John N. Weinstein<sup>32</sup>, Winghing Wong<sup>4</sup>

### **Analysis working group**

Rehan Akbani<sup>28</sup>, Matthew L. Anderson<sup>42</sup>, Pavana Anur<sup>35</sup>, Matthew H. Bailey<sup>4</sup>, Laurence Baker<sup>97</sup>, Christopher Benz<sup>29</sup>, Jay Bowen<sup>40</sup>, Reanne Bowlby<sup>17</sup>, Andrew S. Brohl<sup>16</sup>, Lauren Byers<sup>36</sup>, Andrew D. Cherniack<sup>1</sup>, Lee A.D. Cooper<sup>39</sup>, Leslie Cope<sup>23</sup>, Ludmila Danilova<sup>23</sup>, Ian J. Davis<sup>8,15</sup>, Lara E. Davis<sup>104</sup>, George D. Demetri<sup>50,51</sup>, Elizabeth G.

Demicco<sup>58</sup>, Lixia Diao<sup>32</sup>, Li Ding<sup>4,99</sup>, Esther Drill<sup>27</sup>, Ina Felau<sup>90</sup>, Carl M. Gay<sup>105</sup>, Andrew K. Godwin<sup>77</sup>, Juneko E. Grilley-Olson<sup>9,10</sup>, David A. Gutman<sup>39</sup>, Apurva M. Hegde<sup>32</sup>, Austin J. Hepperla<sup>9</sup>, Katherine A. Hoadley<sup>8,9</sup>, Lisa Iype<sup>28</sup>, Kevin B. Jones<sup>106</sup>, Katayoon Kasaian<sup>17</sup>, Marc Ladanyi<sup>100</sup>, Alexander J. Lazar<sup>74,94</sup>, Sanghoon Lee<sup>39</sup>, Kristen M. Leraas<sup>40</sup>, Tara M. Lichtenberg<sup>40</sup>, John A. Martignetti<sup>107</sup>, Michael D. McLellan<sup>4</sup>, Christopher A. Miller<sup>4</sup>, Karen Mungall<sup>17</sup>, Michael Nalisnik<sup>39</sup>, Michael S. Noble<sup>1</sup>, Chandrajit P. Raut<sup>45,46,47</sup>, Richard F. Riedel<sup>98</sup>, A. Gordon Robertson<sup>17</sup>, Jason Roszik<sup>7,34</sup>, Sara Sadeghi<sup>17</sup>, Francisco Sanchez-Vega<sup>30</sup>, Ronglai Shen<sup>27</sup>, Juliann Shih<sup>1,19</sup>, Samuel Singer<sup>101</sup>, Pan Tong<sup>32</sup>, Keila E. Torres<sup>7,75</sup>, Matt van de Rijn<sup>96</sup>, Brian A. Van Tine<sup>102</sup>, Jing Wang<sup>32</sup>, Christina Yau<sup>29</sup>, Jean C. Zenklusen<sup>90</sup>

### **Project Chairs**

Elizabeth G. Demicco<sup>58</sup>, Li Ding<sup>4,99</sup>, Marc Ladanyi<sup>100</sup>, Alexander J. Lazar<sup>74,94</sup>, Samuel Singer<sup>101</sup>, Brian A. Van Tine<sup>102</sup>

### **Institutions**

<sup>1</sup> The Eli and Edythe L. Broad Institute of Massachusetts Institute of Technology and Harvard University, Cambridge, Massachusetts 02142, USA

<sup>2</sup>Cancer Center and <sup>3</sup>Department of Pathology, Massachusetts General Hospital and Harvard Medical School, Boston, MA, 02114, USA

<sup>4</sup> McDonnell Genome Institute, Washington University, St. Louis, MO 63108 USA

<sup>5</sup>Genomics Institute, University of California Santa Cruz, Santa Cruz, CA 95064 USA

<sup>6</sup>Institute for Applied Cancer Science, and <sup>7</sup>Department of Genomic Medicine, The University of Texas MD Anderson Cancer Center, Houston, TX 77030 USA

<sup>8</sup>Department of Genetics, <sup>9</sup>Lineberger Comprehensive Cancer Center, <sup>10</sup>Department of Internal Medicine, Division of Medical Oncology, <sup>11</sup>Department of Pathology and Laboratory Medicine, School of Medicine, <sup>12</sup>Department of Biology, <sup>13</sup>Carolina Center for Genome Sciences, <sup>14</sup>Research Computing Center, and <sup>15</sup>Department of Pediatrics, University of North Carolina at Chapel Hill, Chapel Hill, NC 27599 USA

<sup>16</sup> Sarcoma Department, H. Lee Moffitt Cancer Center, Tampa, FL 33612 USA

<sup>17</sup> Canada's Michael Smith Genome Sciences Centre, BC Cancer Agency, Vancouver, BC V5Z 4S6 Canada

<sup>18</sup> Jackson Lab for Genomic Medicine, Farmington, CT 06032 USA

<sup>19</sup>Department of Medical Oncology, Dana-Farber Cancer Institute, Boston, MA 02215, USA

<sup>20</sup>Department of Medicine, and <sup>21</sup>Department of Pathology, Harvard Medical School, Boston, MA 02215, USA

<sup>22</sup> Department of Cancer Biology, Dana-Farber Cancer Institute, Boston, Massachusetts 02215, USA

<sup>23</sup> The Sidney Kimmel Comprehensive Cancer Center, Johns Hopkins University, Baltimore, MD 21231 USA

<sup>24</sup> Norris Comprehensive Cancer Center, University of Southern California, Los Angeles, CA 90033 USA

<sup>25</sup>Van Andel Research Institute, Center for Epigenetics, Grand Rapids, MI 49503, USA

<sup>26</sup>Department of Medicine, Division of Hematology/Oncology, Medical University of South Carolina, Charleston, SC 29425 USA

<sup>27</sup>Department of Epidemiology and Biostatistics, Memorial Sloan Kettering Cancer Center, New York, NY 10017 USA

<sup>28</sup>Institute for Systems Biology, Seattle, WA, 98109 USA

<sup>29</sup>Buck Institute for Research on Aging, Novato, CA 94945 USA

<sup>30</sup>Center for Molecular Oncology, and <sup>31</sup>Computational Biology Center, Memorial Sloan Kettering Cancer Center, New York, NY 10065 USA

<sup>32</sup>Department of Bioinformatics and Computational Biology, <sup>33</sup>Department of Systems Biology, and <sup>34</sup>Department of Melanoma Medical Oncology, The University of Texas MD Anderson Cancer Center, Houston, TX 77030 USA

<sup>35</sup>Department of Molecular and Medical Genetics, Oregon Health and Science University, Portland, OR 97239 USA

<sup>36</sup>Department of Thoracic/Head & Neck Medical Oncology, The University of Texas MD Anderson Cancer Center, Houston, TX 77030 USA

<sup>37</sup>Center for Biomedical Informatics, Harvard Medical School, Boston, MA 02115, USA

<sup>38</sup>University of California Santa Cruz, Santa Cruz, CA 95064 USA

<sup>39</sup>Emory University, Atlanta, GA 30322 USA

<sup>40</sup>The Research Institute at Nationwide Children's Hospital, Columbus, OH 43205 USA

<sup>41</sup>The Ohio State University, Columbus, OH 43210, USA

<sup>42</sup>Baylor College of Medicine, Houston, TX 77030 USA

<sup>43</sup>Botkin City Hospital, Moscow, 125284 Russia

<sup>44</sup>A.V. Vishnevskiy Institute of Surgery, Moscow, Russia

<sup>45</sup>Department of Surgery, Brigham and Women's Hospital, Harvard Medical School, Boston, MA 02115 USA

<sup>46</sup>Center for Sarcoma and Bone Oncology, Dana-Farber Cancer Institute, Boston, MA 02115 USA

<sup>47</sup>Harvard Medical School, Boston, MA 02215 USA

<sup>48</sup>Women's Cancer Program at the Samuel Oschin Comprehensive Cancer Institute, Cedars-Sinai Medical Center, Los Angeles, CA 90048 USA

<sup>49</sup>Cureline, Inc., South San Francisco, CA 94080, USA

<sup>50</sup>Sarcoma Center, Dana-Farber Cancer Institute, Boston MA 02215 USA

<sup>51</sup>Ludwig Center at Harvard, Harvard Medical School, Boston MA 02215 USA

<sup>52</sup>Winship Cancer Institute, Emory University, Atlanta, GA 30322 USA

<sup>53</sup>Fox Chase Cancer Center, Philadelphia, PA 19111 USA

<sup>54</sup>H Lee Moffitt Cancer Center, Tampa, FL 33612 USA

<sup>55</sup>Gray Cancer Center, Hartford Hospital, Hartford, CT 06102 USA

<sup>56</sup>Helen F. Graham Cancer Center and Research Institute, Newark, DE 19713 USA

<sup>57</sup>Department of Obstetrics, Gynecology, and Reproductive Science, and <sup>58</sup>Department of Pathology, Icahn School of Medicine at Mount Sinai, New York, NY 10029 USA

<sup>59</sup>Institute of Human Virology, Abuja, Nigeria

<sup>60</sup>International Genomics Consortium, Phoenix, AZ 85004 USA

<sup>61</sup>John Wayne Cancer Institute, Santa Monica, CA 90025 USA

<sup>62</sup>Ontario Tumour Bank – London site, London Health Sciences Centre, London, ON N6A 5A5, Canada

<sup>63</sup>Massachusetts General Hospital, Boston, MA 020114 USA

<sup>64</sup>N.N. Blokhin Russian Cancer Research Center, Moscow, 115478 Russia

<sup>65</sup>National Cancer Center of Georgia, Tbilisi, Georgia

- <sup>66</sup>Perlmutter Cancer Center, New York University Langone Medical Center, New York, NY 10016 USA
- <sup>67</sup>Monter Cancer Center, Northwell Health, New Hyde Park, NY, 11042, USA
- <sup>68</sup>Cold Spring Harbor Laboratory, Cold Spring Harbor, NY 11724, USA
- <sup>69</sup>Ontario Tumour Bank, Ontario Institute for Cancer Research, Toronto, ON M5G 0A3, Canada
- <sup>70</sup>St. Joseph's Hospital and Medical Center, Phoenix, AZ 85013 USA
- <sup>71</sup>St. Petersburg Academic University, St Petersburg, 194021 Russia
- <sup>72</sup>St. Petersburg City Oncology Clinic, St. Peterburg, 198255 Russia
- <sup>73</sup>Ontario Tumour Bank – Ottawa site, The Ottawa Hospital, Ottawa, ON K1H 8L6 Canada
- <sup>74</sup>Department of Translational Molecular Pathology, and <sup>75</sup>Department of Surgical Oncology, The University of Texas MD Anderson Cancer Center, Houston, TX 77030 USA
- <sup>76</sup>Chao Family Comprehensive Cancer Center, University of California, Irvine, Orange, CA 92868 USA
- <sup>77</sup>University of Kansas Medical Center, Kansas City, KS 66160 USA
- <sup>78</sup>Department of Epidemiology and Public Health, <sup>79</sup>Institute of Human Virology, and <sup>80</sup>Greenebaum Comprehensive Cancer Center, University of Maryland School of Medicine, Baltimore, MD 21201 USA
- <sup>81</sup>Department of Pathology, and <sup>82</sup>Human Tissue Repository, Department of Pathology, University of New Mexico, Health Sciences Center, School of Medicine, Albuquerque, NM 87131 USA
- <sup>83</sup>University of North Carolina at Chapel Hill, Chapel Hill, NC 27599, USA
- <sup>84</sup>Vanderbilt Ingram Cancer Center, Vanderbilt University, Nashville, TN 37232 USA
- <sup>85</sup>Cancer Genetics, Clinical Research, Urologic Oncology Program, School of Medicine, University of North Carolina at Chapel Hill, Chapel Hill, NC 27599 USA
- <sup>86</sup>Department of Neurology, Washington University, St. Louis, MO 63110 USA
- <sup>87</sup>Leidos Biomedical Research, Rockville, MD 20850 USA
- <sup>88</sup>Leidos Biomedical Research, Gaithersburg, MD 20877 USA
- <sup>89</sup>CSRA Incorporated, Falls Church, VA 22042 USA
- <sup>90</sup>National Cancer Institute, Bethesda, MD 20892 USA
- <sup>91</sup>MLF Consulting, Arlington, MA 02474 USA
- <sup>92</sup>National Human Genome Research Institute, National Institutes of Health, Bethesda, MD 20892 USA
- <sup>93</sup>Department of Pathology, Brigham and Women's Hospital, Harvard Medical School, Boston, MA 02115 USA
- <sup>94</sup>Department of Pathology, The University of Texas MD Anderson Cancer Center, Houston, TX 77030 USA
- <sup>95</sup>Robert J. Tomsich Pathology and Laboratory Medicine Institute and Department of Cancer Biology, Cleveland Clinic and Lerner Research Institute, Cleveland, OH 44195 USA
- <sup>96</sup>Department of Pathology, Stanford University Medical Center, Stanford CA 94305 USA
- <sup>97</sup>University of Michigan, Ann Arbor, MI 48109 USA

<sup>98</sup>Department of Medicine, Division of Medical Oncology, Duke University Medical Center, Durham, NC 27710 USA

<sup>99</sup>Department of Medicine, Washington University, St. Louis, MO 63110 USA

<sup>100</sup>Department of Pathology, and <sup>101</sup>Department of Surgery, Memorial Sloan Kettering Cancer Center, New York, NY 10065 USA

<sup>102</sup>Medical Oncology, Washington University, St. Louis, MO 63110 USA

<sup>103</sup>Department of Surgery, Division of Surgical Oncology, The Ohio State University, Columbus, OH 43210 USA

<sup>104</sup>Knight Cancer Institute, Oregon Health & Science University, Portland, OR 97239 USA

<sup>105</sup>Division of Cancer Medicine, The University of Texas MD Anderson Cancer Center, Houston, TX 77030 USA

<sup>106</sup>Huntsman Cancer Institute, University of Utah, Salt Lake City, UT 84112 USA

<sup>107</sup>Department of Genetics and Genomic Sciences, Icahn School of Medicine at Mount Sinai, New York, NY 10029 USA

<sup>108</sup>INSERM U1218, F-33076 Bordeaux, France
