# Supplementary material
Source: PubMed Central journal article supplement (PMC5693358)
Supplement: NIHMS912614-supplement-11.pdf [file NIHMS912614-supplement-11.pdf]

Supplemental Table S2. Samples with gain in telomere length as inferred by BIC-guided Gaussian clustering. Related to Figure 2.

| <b>TCGA ID</b>   | <b>Histologic Subtype</b> | <b>Mutated ATRX</b> | <b>ATRX deletion</b> |
|------------------|---------------------------|---------------------|----------------------|
| TCGA-DX-A8BV-01A | MFS                       | <b>Yes</b>          | No                   |
| TCGA-WK-A8XX-01A | STLMS                     | No                  | <b>Yes</b>           |
| TCGA-IE-A3OV-01A | STLMS                     | No                  | <b>Yes</b>           |
| TCGA-DX-A6BA-01A | STLMS                     | No                  | <b>Yes</b>           |
| TCGA-QQ-A5VC-01A | STLMS                     | No                  | <b>Yes</b>           |
| TCGA-DX-A8BN-01A | UPS                       | <b>Yes</b>          | No                   |
| TCGA-DX-A8BK-01A | UPS                       | No                  | <b>Yes</b>           |
| TCGA-DX-A8BU-01A | UPS                       | <b>Yes</b>          | No                   |
| TCGA-DX-A1KY-01A | DDLPS                     | No                  | No                   |
| TCGA-DX-A3LT-01A | DDLPS                     | No                  | No                   |
| TCGA-DX-A6YR-01A | MFS                       | No                  | No                   |
| TCGA-DX-AB2E-01A | MFS                       | No                  | No                   |
| TCGA-IF-A4AJ-01A | STLMS                     | No                  | No                   |
| TCGA-DX-A48P-01A | STLMS                     | No                  | No                   |
| TCGA-DX-A48U-01A | STLMS                     | No                  | No                   |
| TCGA-X6-A8C5-01A | STLMS                     | No                  | No                   |
| TCGA-IE-A4EK-01A | STLMS                     | No                  | No                   |
| TCGA-PC-A5DL-01A | STLMS                     | No                  | No                   |
| TCGA-DX-A48K-01A | STLMS                     | No                  | No                   |
| TCGA-IS-A3K6-01A | ULMS                      | No                  | No                   |
| TCGA-K1-A42X-01A | ULMS                      | No                  | No                   |
| TCGA-FX-A76Y-01A | ULMS                      | No                  | No                   |
| TCGA-DX-A8BX-01A | UPS                       | No                  | No                   |
| TCGA-DX-AB2O-01A | UPS                       | No                  | No                   |
