# Supplementary material
Source: PubMed Central journal article supplement (PMC5693358)

Figure S6

Leiomyosarcoma

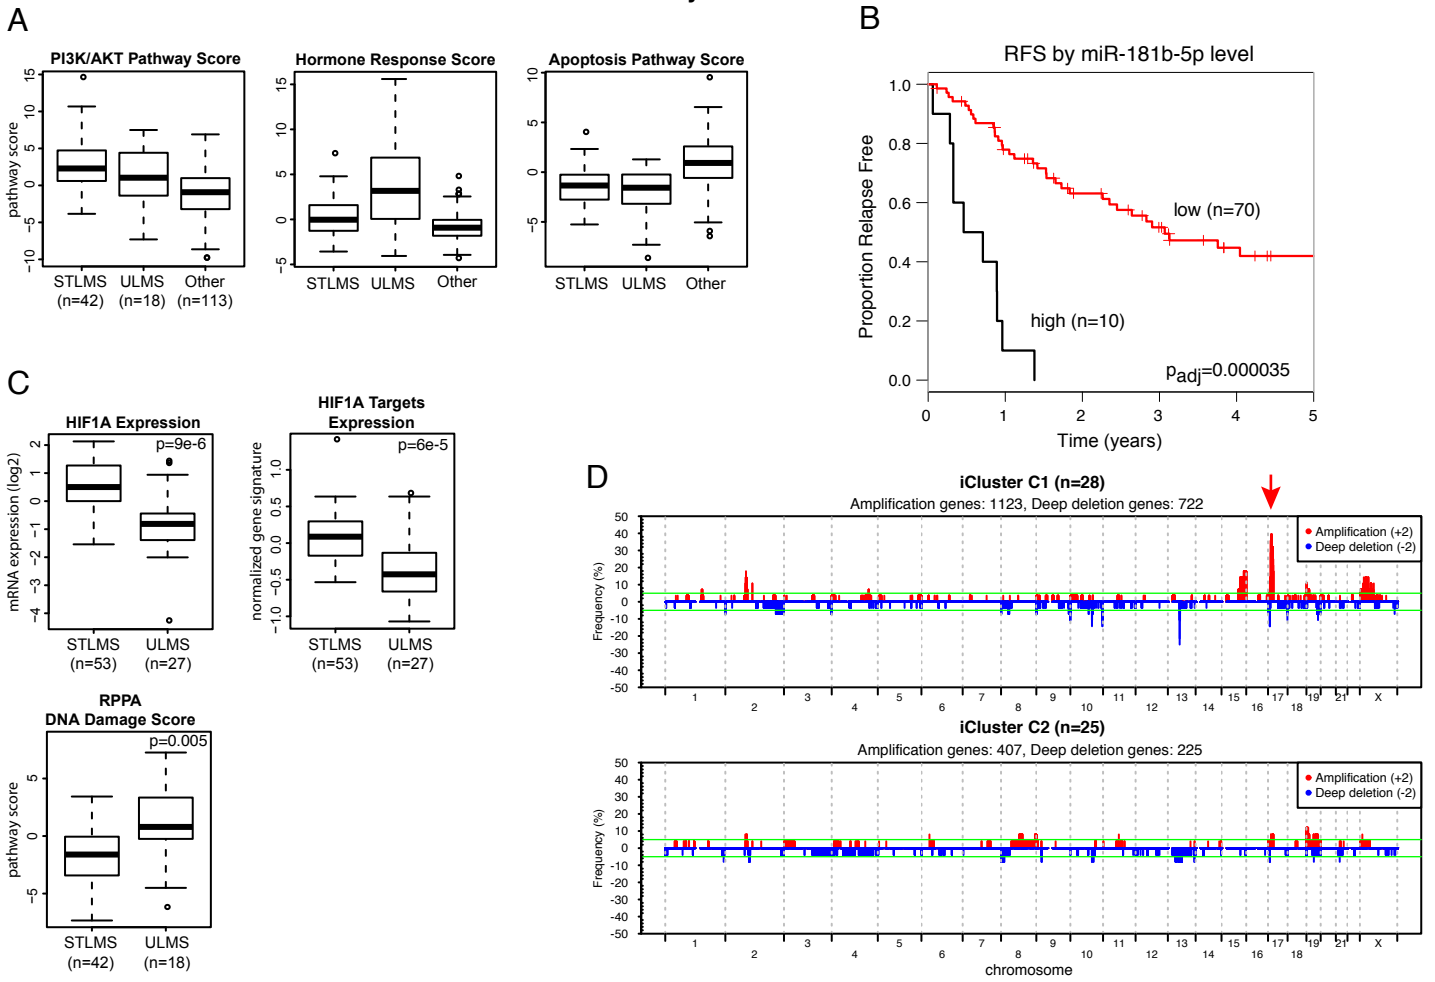

Undifferentiated Pleomorphic Sarcoma and Myxofibrosarcoma

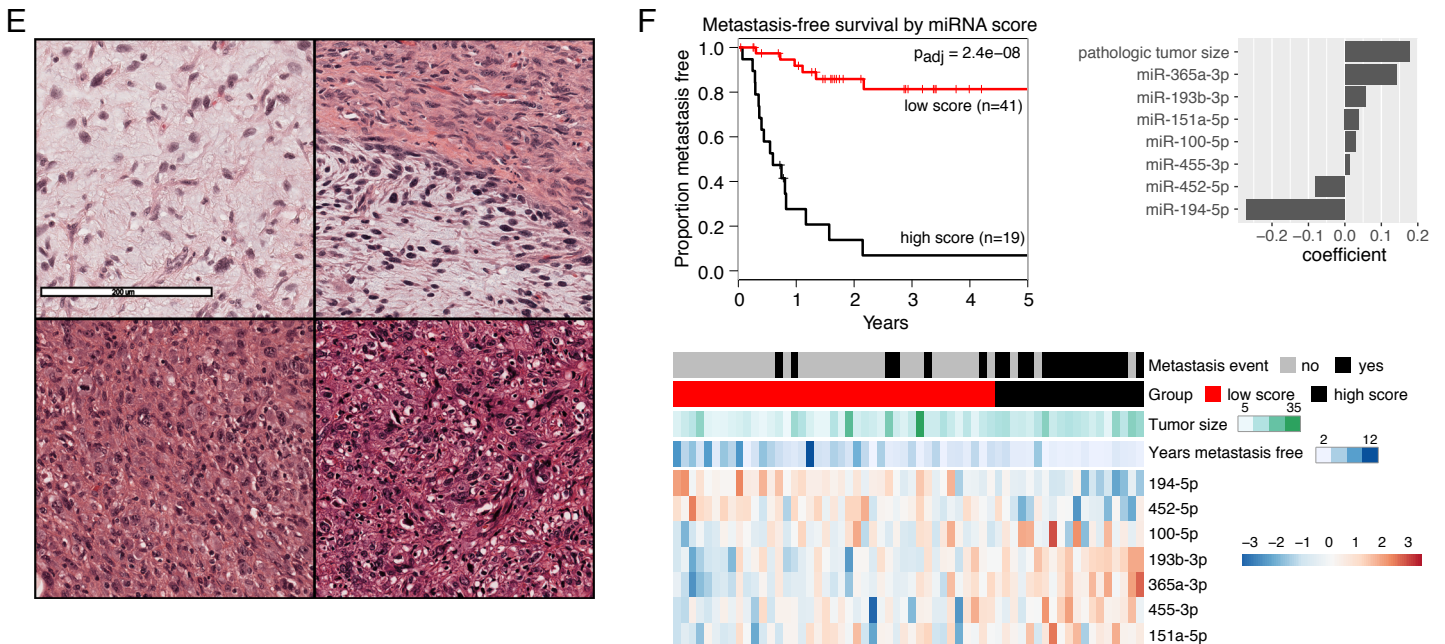

Supplement: NIHMS912614-supplement-6.pdf [file NIHMS912614-supplement-6.pdf]
